# Supplementary material for: Inversion of charge carrier polarity and boosting the mobility of organic semiconducting polymers based on benzobisthiadiazole derivatives by fluorination
Source: Royal Society of Chemistry journal article supplement (doi:10.1039/c7tc04993e), 2017-11-30
Supplement: c7tc04993e1.pdf [file c7tc04993e1.pdf]

Electronic Supplementary Material (ESI) for Journal of Materials Chemistry C.

This journal is © The Royal Society of Chemistry 2017

## **Supporting Information**

### **Inversion of the charge carrier polarity and boosting the mobility of organic semiconducting polymers based on benzobisthiadiazole derivatives by fluorination**

**Yang Wang\*, Aaron Tze-Rue Tan, Takehiko Mori and Tsuyoshi Michinobu\***

*Department of Materials Science and Engineering, Tokyo Institute of Technology,  
2-12-1 Ookayama, Meguro-ku, Tokyo 152-8552, Japan*

\*Corresponding address:

Yang Wang

Tel/Fax: +81-3-5734-2469, E-mail: wang.y.av@m.titech.ac.jp

Tsuyoshi Michinobu

Tel/Fax: +81-3-5734-3774, E-mail: michinobu.t.aa@m.titech.ac.jp

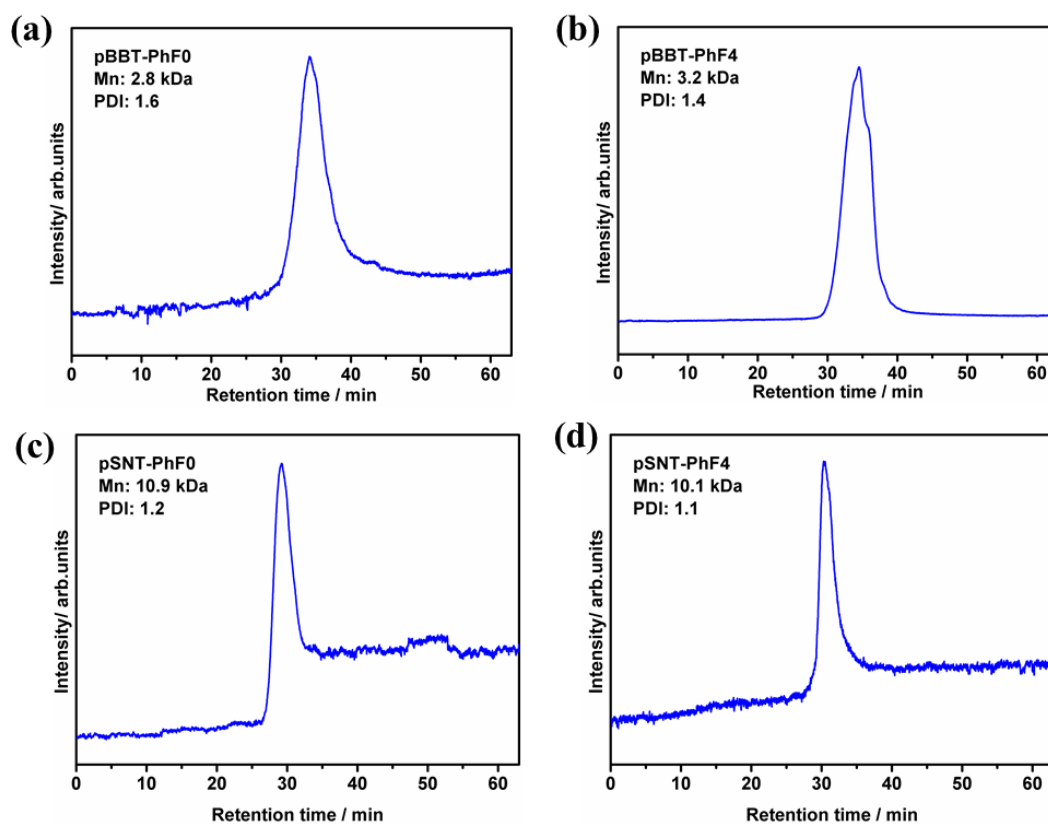

**Fig. S1** GPC curves of (a) pBBT-PhF0, (b) pBBT- PhF4, (c) pSNT-PhF0, and (d) pSNT-PhF4 using 1,2-dichlorobenzene as the eluent at 40 °C. Polystyrene standards were used to estimate the molecular weights.

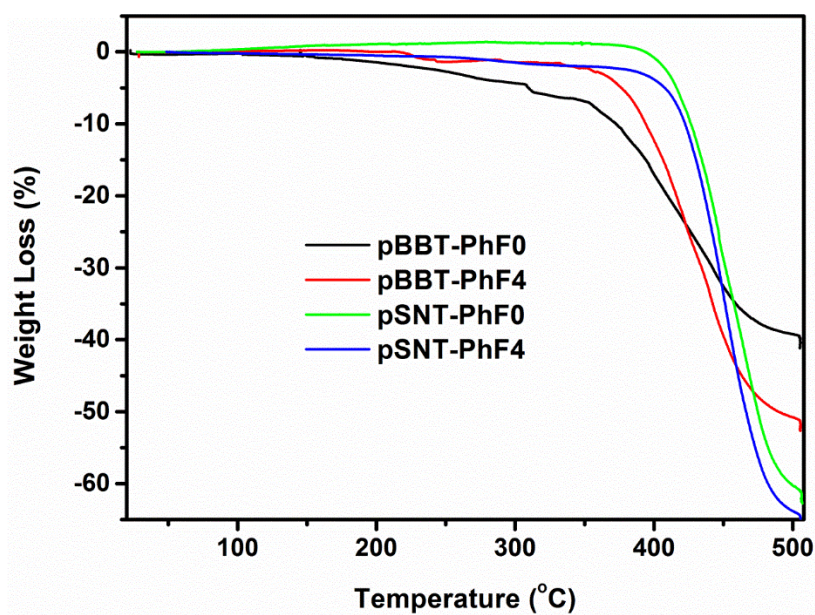

**Fig. S2** Thermogravimetric analysis (TGA) curves of the copolymers under nitrogen atmosphere at the heating rate of 10 °C min<sup>-1</sup>.

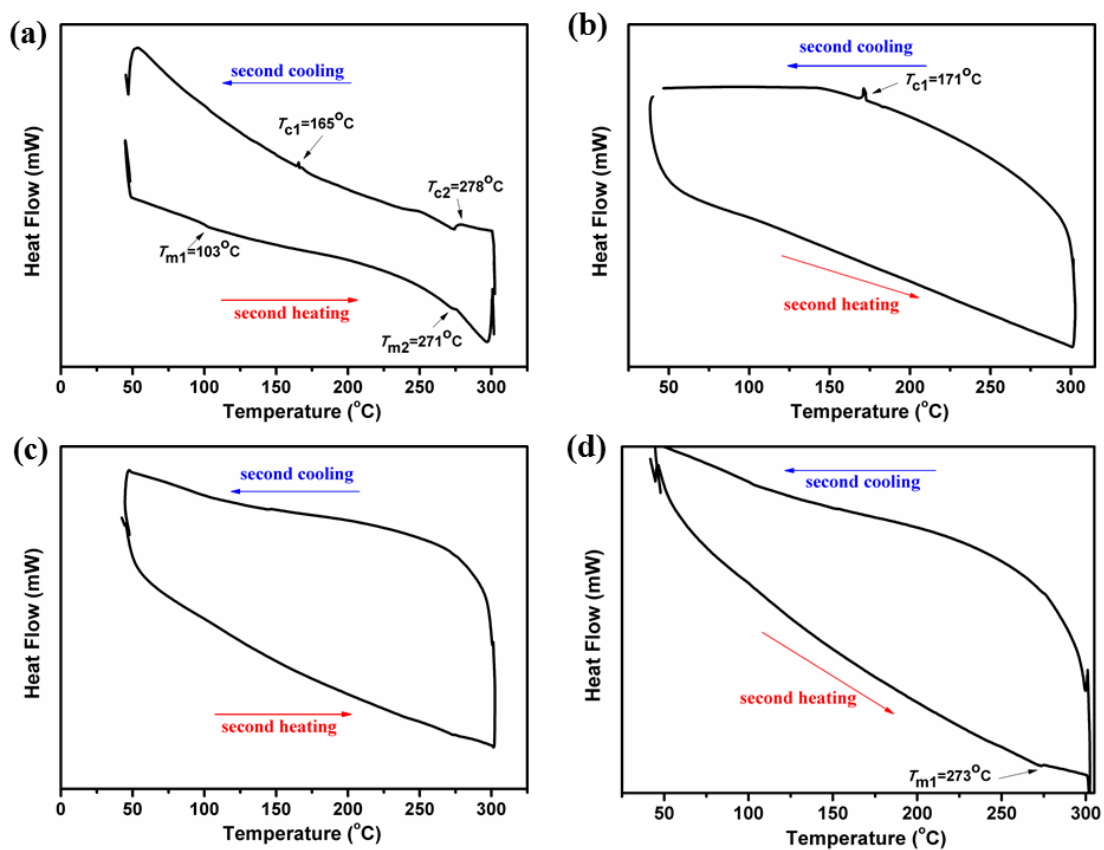

**Fig. S3** Differential scanning calorimetry (DSC) curves of (a) pBBT-PhF0, (b) pBBT-PhF4, (c) pSNT-PhF0, and (d) pSNT-PhF4. All the DSC curves are the second heating and cooling processes under nitrogen flow ( $50 \text{ mL min}^{-1}$ ) at the scan rate of  $10 \text{ }^\circ\text{C min}^{-1}$ .

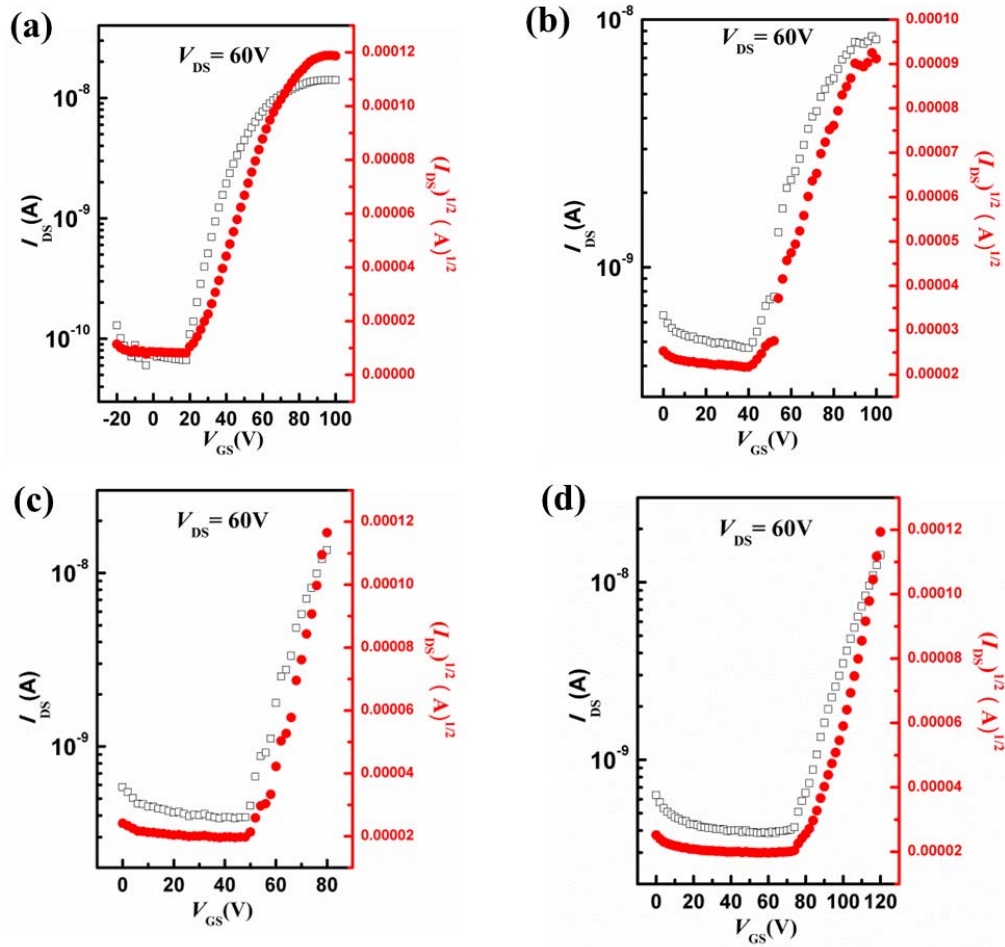

**Fig. S4** Thermal annealing temperature dependent current–voltage ( $I$ – $V$ ) characteristics of pBBT-PhF4-based TFTs (a) without thermal annealing; (b) with thermal annealing at 100 °C; (c) with thermal annealing at 125 °C; and (d) with thermal annealing at 175 °C (electron-enhancement operation with  $V_{DS} = 60$  V,  $L = 100$   $\mu\text{m}$  and  $W = 1$  mm, measured in a vacuum chamber with a pressure of  $10^{-4}$  mbar).

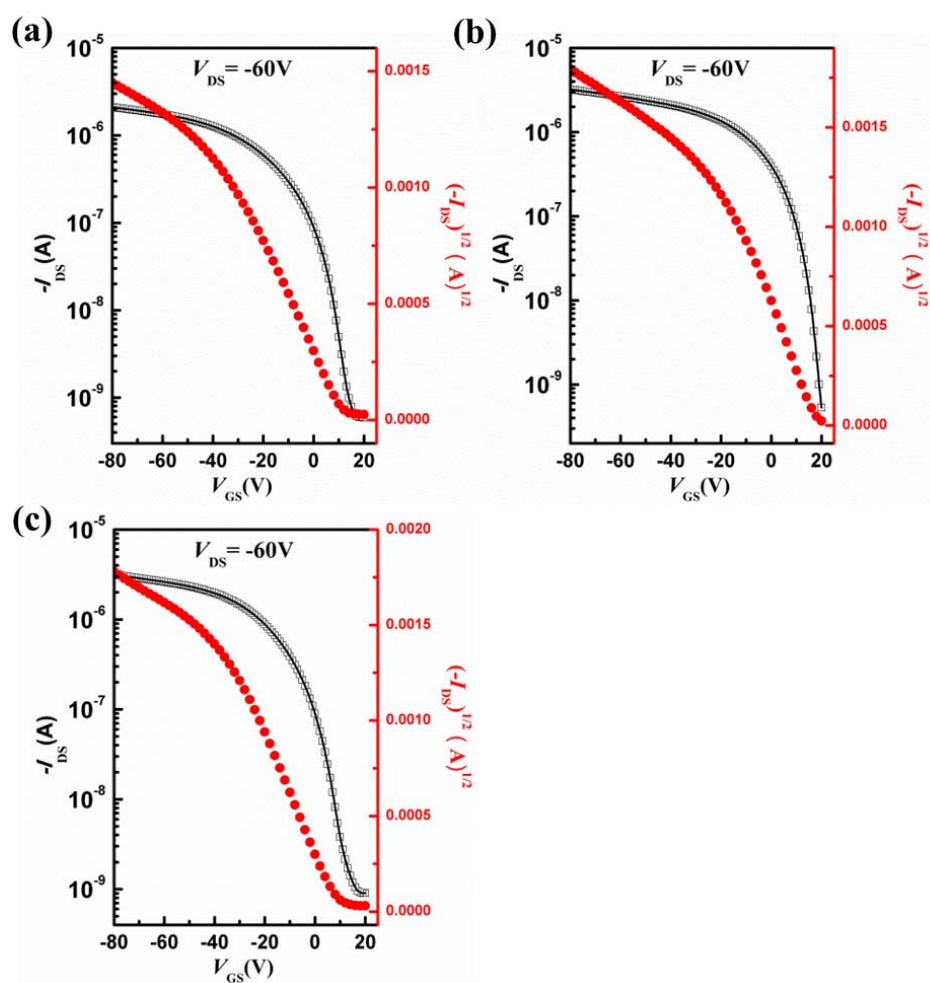

**Fig. S5** Thermal annealing temperature dependent current–voltage ( $I$ – $V$ ) characteristics of pSNT-PhF0-based TFTs (a) without thermal annealing; (b) with thermal annealing at 150 °C; and (c) with thermal annealing at 250 °C (hole-enhancement operation with  $V_{DS} = -60$  V,  $L = 100$   $\mu\text{m}$  and  $W = 1$  mm, measured in air).

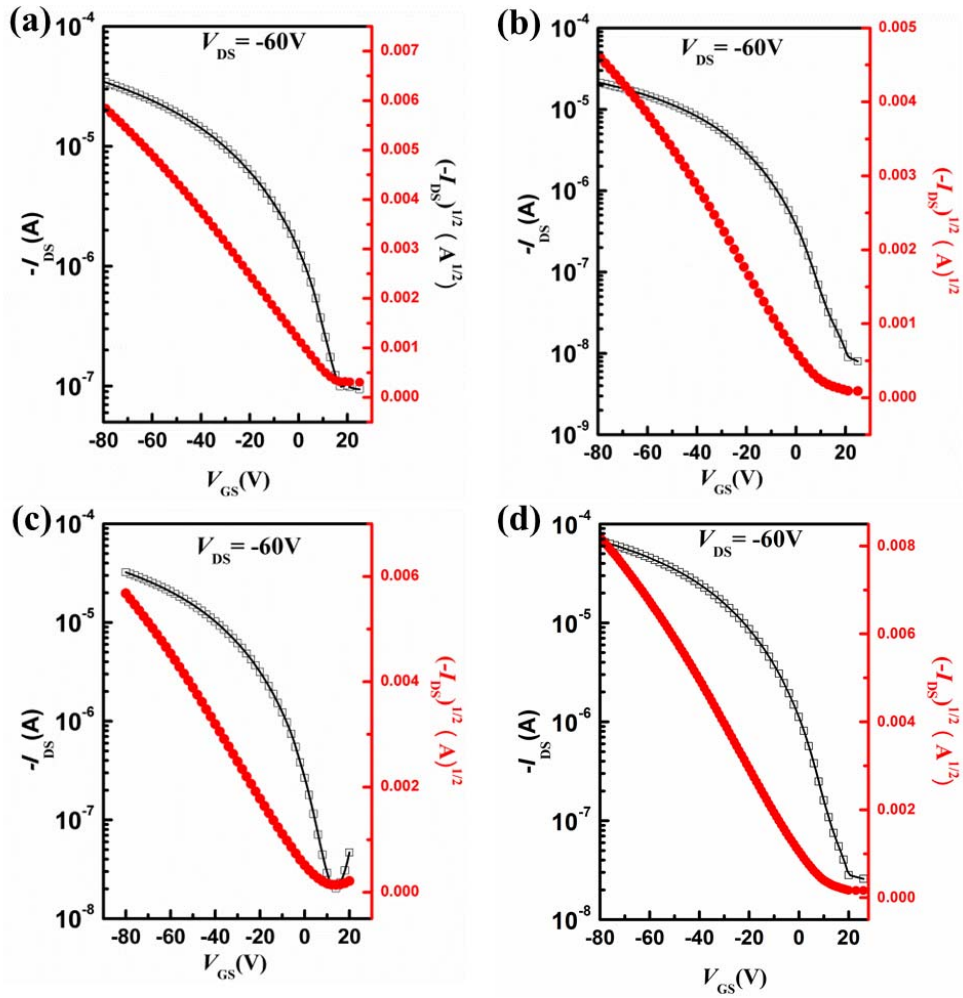

**Fig. S6** Thermal annealing temperature dependent current-voltage ( $I$ - $V$ ) characteristics of pSNT-PhF4-based TFTs (a) without thermal annealing; (b) with thermal annealing at 150 °C; (c) with thermal annealing at 200 °C; and (d) with thermal annealing at 200 °C (hole-enhancement operation with  $V_{DS} = -60$  V,  $L = 100$   $\mu$ m and  $W = 1$  mm, measured in air).

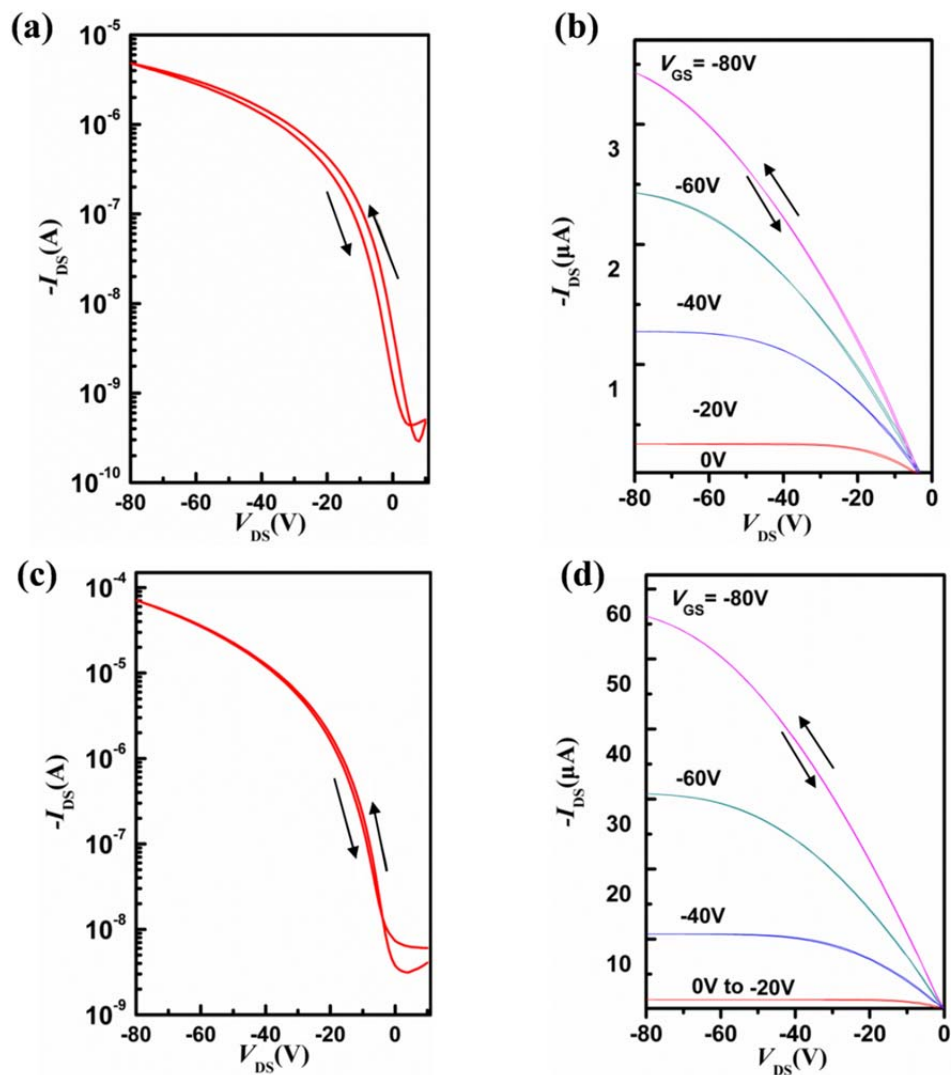

**Fig. S7** The hysteresis test of the TFT devices: (a) forward and reverse curves of the transfer characteristics of pSNT-PhF0; (b) forward and reverse curves of the output characteristics of pSNT-PhF0; (c) forward and reverse curves of the transfer characteristics of pSNT-PhF4; (d) forward and reverse curves of the output characteristics of pSNT-PhF4.

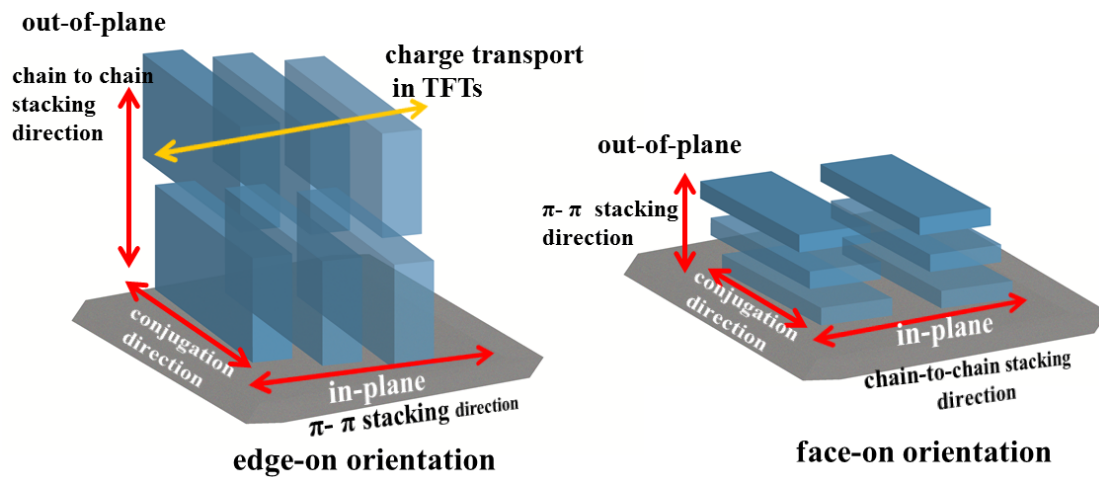

**Fig. S8** Schematic illustration of the charge transport model in lamellar stacking conjugated polymers. Left: edge-on texture of polymeric crystallites; Right: face-on texture of polymeric crystallites.



## NMR charts

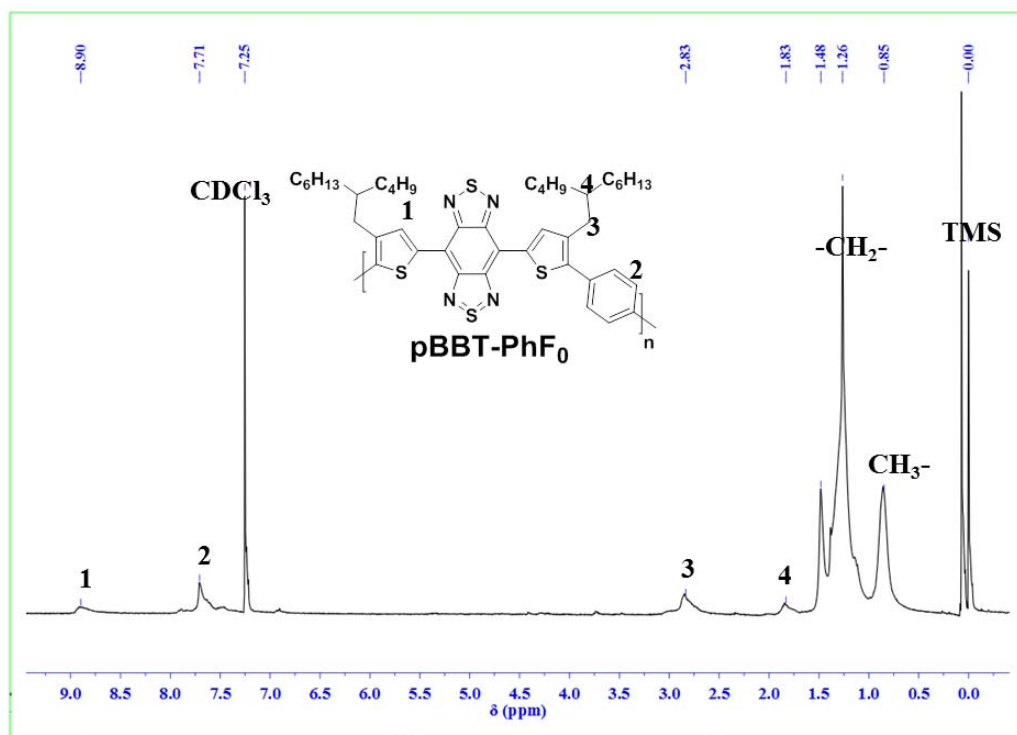

Fig. S9  $^1\text{H}$  NMR spectrum of pBBT-PhF<sub>0</sub> in  $\text{CDCl}_3$ .

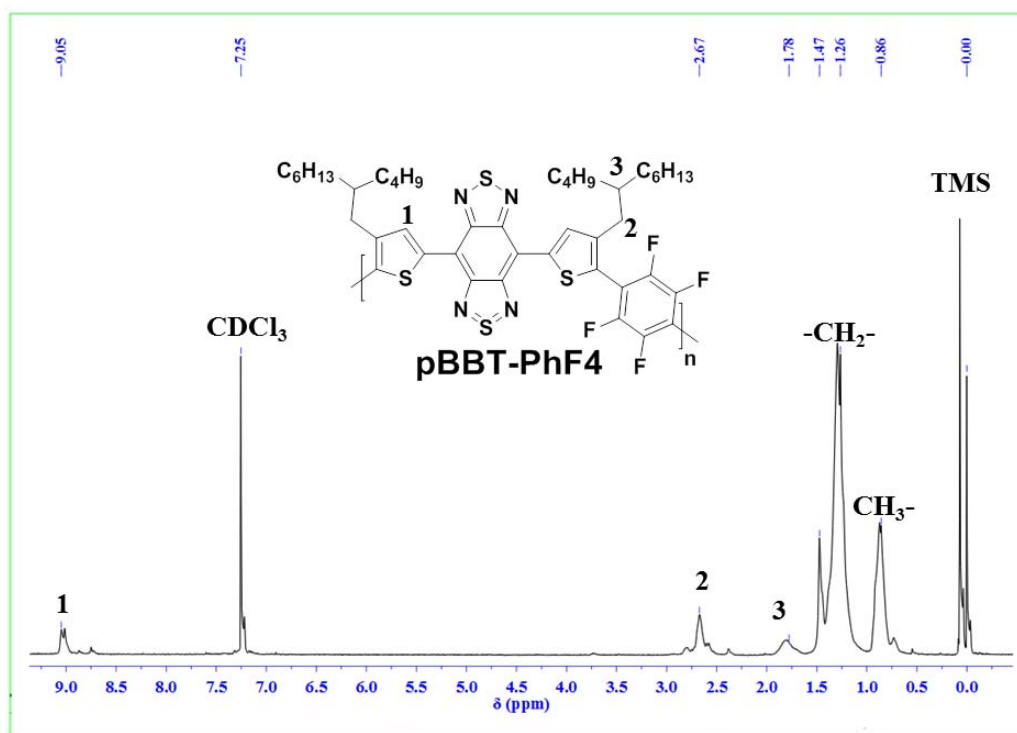

Fig. S10  $^1\text{H}$  NMR spectrum of pBBT-PhF<sub>4</sub> in  $\text{CDCl}_3$ .

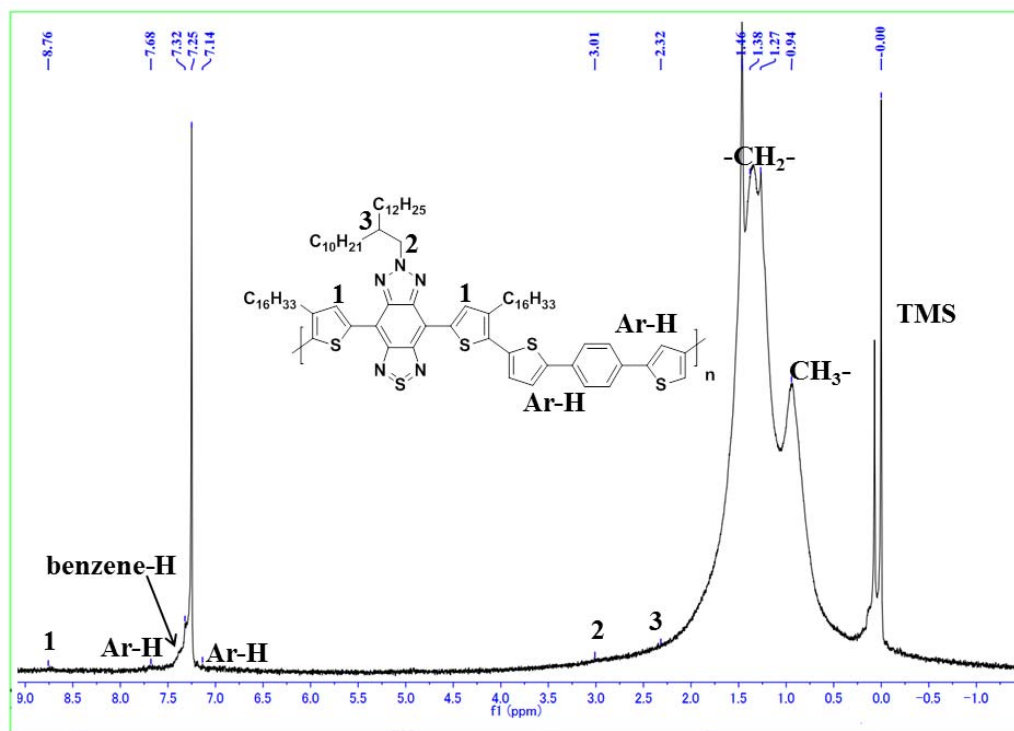

Fig. S11  $^1\text{H}$  NMR spectrum of pSNT-PhF0 in  $\text{CDCl}_3$ .

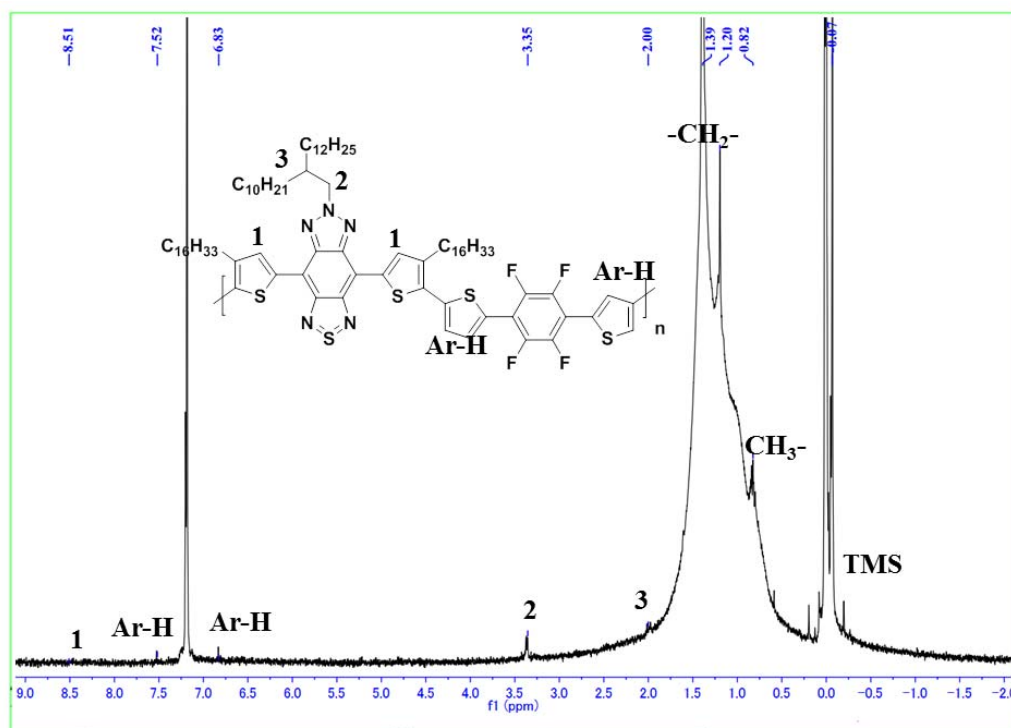

Fig. S12  $^1\text{H}$  NMR spectrum of pSNT-PhF4 in  $\text{CDCl}_3$ .
